# Supplementary material for: Impact of Diabetes Mellitus and Chronic Kidney Disease on Cardiovascular Outcomes and Platelet P2Y12 Receptor Antagonist Effects in Patients With Acute Coronary Syndromes: Insights From the PLATO Trial
Source: PubMed Central journal article supplement — J Am Heart Assoc. 2019 Mar 12;8(6):e011139. doi: 10.1161/JAHA.118.011139 (PMC6475041; doi:10.1161/jaha.118.011139), 2019-03-12
Supplement: JAH3-8-e011139-s001.pdf [file JAH3-8-e011139-s001.pdf]

# **SUPPLEMENTAL MATERIAL**

## Appendix

### PLATO Investigators (A-Z)

Alexander Nikolaevich Parkhomenko (Research Institute of Cardiology, Kiev, UA)

Ali Oto (Hacettepe Univ School of Medicine, Ankara, TR)

Allan Skene (Worldwide Clinical Trials, Inc; Nottingham, GB)

Andrzej Budaj (Grochowski Hospital, Warsaw, PL)

Anneli Freij (AstraZeneca, Mölndal, SE)

Anwar Santoso (Udayana School of Medicine, Denpasar, ID)

Armando (García Castillo, Hospital de Cardiología UMAE, Nuevo Leon, MX)

Basil S Lewis (Lady Davis Carmel Medical Center, Haifa, IL)

Bernhard Meier (University Hospital, Bern, CH)

Cheuk Man Yu (Chinese University of Hong Kong, HK)

Christopher P Cannon (TIMI study group, Brigham and Women's Hospital, Boston, MA, US)

Dato Seri Robaayah Zambahari (National Heart Institute, Kuala Lumpur, MY)

Delon Wu Wu (Chang Gung Memorial Hospital-Linkou, Tao-Yuan, TW)

Diego Ardissino (Ospedale Maggiore di Parma, Parma, IT)

Dimitar Raev (Medical Institute, Ministry of Interior, Sofia, BG)

Dimitrios Kremastinos (Attikon University General Hospital, Athens, GR)

Douglas Weaver (Henry Ford Heart & Vascular Inst, Detroit, MI, US)

Ernesto Paolasso (Estudios Clinicos Latin America, Rosario, AR)

Evangelos Giannitsis (University of Heidelberg, Heidelberg, DE)

Frederic Kontny (Volvat Medical Center, Oslo, NO)

Freek Verheugt (UMC St Radboud, Nijmegen, NL)

Gerald Maurer (Medical University of Vienna, Vienna, AT)

Hugo Katus (Universitätsklinik Heidelberg, Heidelberg, DE)

Håkan Emanuelsson (AstraZeneca, Mölndal, SE)

Jan H Cornel (Medisch Centrum Alkmaar, Alkmaar, NL)

Jay Horrow (AstraZeneca, Wilmington, DE, US)

Jean-Pierre Bassand (University Hospital Jean Minjoz, Besancon, FR)

Jindrich Spinar (University Hospital Brno, Brno, CZ)

João Morais (Santo Andrés Hospital, Leiria, PT)

Jose Lopez Sendon (Hospital Universitario La Paz, Madrid, ES)

José Nicolau (Heart Institute (InCor), São Paulo, BR)

Ki-Bae Seung (Kangnam St. Mary's Hospital, Seoul, KR)

Lars Wallentin (Uppsala Clinical Research Center, Uppsala, SE)

Lim Soo Teik (Heart Centre, Singapore, SG)

Magda Heras (Hospital Clinic of Barcelona, Barcelona, ES)

Marc J Claeys (University Hospital Antwerp, Edegem, BE)

Marc Sabatine (Brigham & Women's Hospital, Boston, MA, US)

Marius Vintila (St Pantelimon University Hospital, Bucharest, RO)

Matyas Keltai (Semmelweis University, Budapest, HU)

Mikhail Ruda (Cardiology Research Center, Moscow, RU)

Mona Thorsén (AstraZeneca, Mölndal, SE)

Neil Kleiman (Baylor College of Medicine, Houston, TX, US)

Noe Babilonia (Philippine Heart Center, Quezon City, PH)

Patrick Commerford (Groote Schuur Hospital, Cape Town, ZA)

Paul Gurbel (Sinai Hospital, Baltimore, MD, US)

Phil Aylward (Flinders Medical Centre, Bedford Park, AU)

Philippe Gabriel Steg (Hospital Bichat-Claude Bernard, Paris, FR)

Pierre Thérioux (Montreal Heart Institute, Montreal, CA)

Piyamitr Sritara (Ramathibodi Hospital, Bangkok, TH)

Prem Pais (St.John's Medical College, Bangalore, IN)

Richard Becker (Duke Clinical Research Institute, Durham, NC, US)

Riitta Lassila (Helsinki University Central Hospital, FI)

Robert A Harrington (Duke Clinical Research Institute, Durham, NC, US)

Robert F Storey (Clinical Science Centre, Northern General Hospital and University of Sheffield, Sheffield, UK)

Runlin Gao (Cardiovascular Inst & Fu Wai Hosp, Beijing, CN)

Steen Husted (Aarhus University Hospital, Aarhus, DK)

Stefan K James (Uppsala Clinical Research Center and Uppsala University Hospital, Uppsala, SE)

Tibor Duris (Hospital Nove Zamky, Nove Zamky, SK)

Zaza Chapichadze (Institute of Cardiology, Tblisi, GE)
